# Supplementary material
Source: publisher figshare collection journal article supplement (https://gsapubs.figshare.com/ndownloader/files/25118027)
Supplement: Supplementary file 1 [file 25118027]

## Sheet: Sheet1
Supplementary Table DR3- Whole rock composition of Torbat-e-Heydarieh peridotites and mantle gabbros.
Rock Name	Peridotite	Peridotite	Peridotite	Microgabbro dike	Isot. gabbro	Cumulate gabbro	Isot. gabbro	Cumulate gabbro	Isot. gabbro	Isot. gabbro	Cumulate gabbro	Cumulate gabbro	Isot. gabbro	Cumulate gabbro	Cumulate gabbro	Cumulate gabbro	Isot. gabbro
Sample	TH11-3	TH11-56	TH11-46	TH11-10	TH11-78	TH11-60	TH11-90	TH11-47	TH11-77	TH11-74	TH11-51	TH11-57	TH11-76	TH11-52	TH11-49	TH11-54	TH11-75
SiO2	40.2	43.9	40.7	49.7	45.3	51.1	52	49.5	43.8	54.4	48.7	50	47.5	47.4	48.4	48.2	49.2
Al2O3	1.62	5.06	2.32	15	22.2	12.25	10.45	18.9	19.1	13.8	18.95	13.9	17.9	20.5	18.35	16.55	12.1
Fe2O3	7.01	8.91	7.71	10.85	1.56	6.3	9.53	5.43	2.33	7.95	5.5	6.01	2.02	4.34	5.11	5.89	8.25
CaO	1.56	8.92	2.26	9.79	20.3	13.9	12.45	14.85	20.1	11.85	14.45	16.2	20.4	13.9	14.85	13.85	12.15
MgO	36.9	26	37.4	4.25	5.28	16.25	12.95	10.1	5.3	9.17	10.4	14	6.99	8.11	10.1	10.5	15.25
Na2O	0.02	0.09	0.1	4.11	0.83	0.32	1.25	0.67	1.36	1.55	0.83	0.23	1.36	1.55	0.67	1.02	1.02
K2O	0.01	0.01	<0.01	2.04	0.06	<0.01	0.06	0.11	0.01	0.1	0.12	0.01	0.02	0.39	0.08	0.11	0.04
TiO2	<0.01	0.05	0.06	0.88	0.31	0.07	0.33	0.07	0.84	0.4	0.07	0.06	0.42	0.06	0.06	0.08	0.3
MnO	0.11	0.15	0.11	0.18	0.03	0.14	0.16	0.11	0.04	0.14	0.11	0.13	0.03	0.09	0.1	0.11	0.14
P2O5	<0.01	<0.01	<0.01	0.12	0.53	<0.01	0.03	0.04	0.27	0.03	<0.01	<0.01	0.08	0.04	0.01	0.07	<0.01
LOI	11.7	5.86	10.9	3.37	3.31	0.64	1.8	0.78	5.78	1.18	1.67	0.99	4.87	3.4	0.95	3.12	2.76
Total	99.13	98.95	101.56	100.29	99.71	100.97	101.01	100.56	98.93	100.57	100.8	101.53	101.59	99.78	98.68	99.5	101.21
Sc	10.43	37.47	10.72	32.07	13.51	52.48	48.65	36.79	33.69	41.66	37.18	56.96	40.43	30.52	36.44	40.08	42.61
Ti	0.0072	0.0687	0.086	1.358	0.4833	0.1109	0.4999	0.0996	1.325	0.6022	0.095	0.0821	0.6487	0.0923	0.097	0.1216	0.4474
V	48.85	95.89	53.97	302.9	130.8	151.3	215.7	99.98	281.7	219.8	99.84	142.3	197.9	94.76	101.3	116.9	184.2
Cr	2600.5	2336.5	2134.5	13.66	47.85	747.35	711.4	316.2	11.135	356.8	144.4	529.35	6.022	409.95	380.7	224	767.55
Mn	0.1274	0.1527	0.1172	0.1696	0.0498	0.1435	0.1525	0.1118	0.0398	0.1335	0.1128	0.1322	0.0483	0.0872	0.1033	0.1171	0.1405
Co	110.7	83.88	97.52	32.49	12.38	48.94	48.74	33.73	13.53	37.36	35.18	45.55	17.27	24.65	31.35	35.55	52.65
Ni	1670	890.7	1414	10.82	18.14	224.4	192.5	113.6	24.63	105.2	99.16	157.4	27.59	102.2	122.5	111.4	279.7
Ga	1.183	3.002	1.843	14.17	10.18	6.998	9.221	11.06	9.368	11.14	11.17	7.734	7.436	10.27	10.62	9.479	8.727
Rb	0.4343	0.2566	0.5069	21.69	0.5355	0.0273	0.2743	1.689	0.0415	0.9546	2.657	0.0385	0.0674	6.729	1.043	1.862	0.2864
Sr	2.808	38.74	16.67	2840	641.3	129.5	125.8	329.2	1144	212.7	220.2	120.7	1682	343.4	271.6	337.1	289.8
Y	0.3216	1.365	1.975	21.91	9.545	2.005	9.69	2.245	13.95	11.17	1.985	1.436	11.31	2.134	2.167	2.477	8.775
Zr	0.1116	0.3052	0.9333	52.39	9.066	0.3792	15.36	0.4811	8.92	18.85	0.446	0.1518	8.46	0.4892	0.4807	0.6	12.91
Nb	0.0095	0.0058	0.0065	1.537	0.6728	0.0026	0.522	0.0055	0.8257	0.4292	0.0036	0.0022	0.4332	0.0042	0.0033	0.0052	0.2421
Cs	0.1305	0.029	1.516	6.134	0.0508	0.0037	0.016	0.1936	0.0104	0.048	0.3907	0.0051	0.0099	1.685	0.1263	0.2928	0.0226
Ba	1.976	3.515	0.7511	255.1	16.75	0.9288	9.494	5.703	7.02	13.42	3.254	0.9235	9.351	35.43	4.144	3.011	10.74
La	0.0115	0.0164	0.0045	3.709	0.9148	0.0272	1.049	0.074	1.073	1.237	0.0659	0.0099	0.5149	0.0795	0.0654	0.0635	0.7659
Ce	0.0128	0.0253	0.0021	9.068	2.191	0.0604	2.494	0.1924	2.732	2.917	0.133	0.0002	1.573	0.173	0.1484	0.1528	1.838
Pr	0.0026	0.0169	0.0146	1.548	0.3932	0.0258	0.44	0.0437	0.5235	0.5057	0.0366	0.0114	0.3368	0.0464	0.0413	0.0446	0.3414
Nd	0.0108	0.1294	0.1392	7.751	2.149	0.1925	2.316	0.2893	2.987	2.643	0.2333	0.0974	2.027	0.2927	0.2835	0.3052	1.863
Sm	0.00645	0.0678	0.0867	2.34	0.79755	0.10335	0.78625	0.1345	1.192	0.93365	0.11605	0.06395	0.8952	0.1365	0.1364	0.14965	0.68085
Eu	0.0017	0.03895	0.0421	0.8538	0.1537	0.07025	0.2863	0.12595	0.29245	0.3365	0.1081	0.0585	0.24885	0.12255	0.11555	0.1137	0.27175
Gd	0.0089	0.1475	0.1856	3.064	1.206	0.2099	1.146	0.2594	1.785	1.393	0.2302	0.1514	1.344	0.2585	0.2613	0.2814	1.057
Tb	0.0025	0.0309	0.0398	0.5425	0.2258	0.0438	0.2183	0.0522	0.3393	0.2589	0.0453	0.0332	0.2685	0.052	0.051	0.058	0.1984
Dy	0.0317	0.22225	0.28095	3.4485	1.4915	0.32255	1.4365	0.3633	2.227	1.721	0.32535	0.24065	1.793	0.363	0.3582	0.40245	1.341
Ho	0.0097	0.0511	0.0663	0.7445	0.3273	0.0743	0.3239	0.0828	0.4863	0.3852	0.0733	0.0549	0.3953	0.0801	0.0817	0.0924	0.2987
Er	0.04015	0.14155	0.19935	2.107	0.9133	0.2109	0.9337	0.2355	1.3435	1.087	0.2101	0.15535	1.1185	0.22815	0.2321	0.2557	0.8474
Tm	0.0083	0.0228	0.034	0.3376	0.1421	0.0347	0.1532	0.0376	0.2088	0.1785	0.0324	0.025	0.1789	0.0359	0.037	0.0417	0.1373
Yb	0.07	0.15045	0.223	2.1905	0.84305	0.23125	0.98585	0.2483	1.2845	1.1525	0.22185	0.1608	1.129	0.23605	0.24275	0.26725	0.8849
Lu	0.0136	0.0243	0.0378	0.3629	0.1296	0.0373	0.1637	0.0397	0.1848	0.1907	0.0361	0.0261	0.1715	0.0376	0.037	0.0445	0.1451
Hf	0.0031	0.02055	0.05395	1.574	0.38895	0.0273	0.5069	0.03075	0.41375	0.63265	0.02955	0.01285	0.4167	0.0322	0.0307	0.0396	0.4338
Ta	0.001	0.0005	0.0005	0.0968	0.0388	0.0002	0.0271	0.0005	0.0383	0.0222	0.0007	0.0002	0.0199	0.0003	0.0002	0.0002	0.0144
Pb	0.0991333	0.5557	0.0416333	0.278033	0.0847333	0.0846667	0.186133	0.186067	0.123333	0.2049	0.0971	0.0452333	0.0505	0.115333	0.0971667	0.110967	0.113933
Th	0.0033	0.0015	0.0012	0.474	0.3331	0.0008	0.2007	0.0007	0.1064	0.2183	0.0009	0.0007	0.1029	0.0003	0.0008	0.0023	0.127
U	0.002	0.0053	0.0006	0.1161	0.0499	0.0005	0.0773	0.0002	0.0466	0.0925	0.0009	0.0006	0.0381	0.0007	0.0001	0.0047	0.0409
